# Supplementary material
Source: PubMed Central journal article supplement (PMC4565522)
Supplement: NIHMS719550-supplement-1.pdf [file NIHMS719550-supplement-1.pdf]

**Anticancer Activity of the Aurora A Kinase Inhibitor MK-5108 in Non-Small Cell Lung Cancer (NSCLC) *In Vitro* as Monotherapy and in Combination with Chemotherapies**

Danielle C. Chinn<sup>1</sup>, William S. Holland<sup>1</sup>, Philip C. Mack<sup>1\*</sup>

<sup>1</sup>University of California, Davis Cancer Center

4501 X Street, Suite 3016, Sacramento, CA, 95817, USA

\*Corresponding author:

Philip C. Mack, Ph.D.

Division of Hematology/Oncology

UC Davis Cancer Center

4501 X Street

Suite 3016

Sacramento, CA 95817

Phone: (916) 734-8022

Fax: (916) 734-2361

Email: [pcmack@ucdavis.edu](mailto:pcmack@ucdavis.edu)

**Online Resource 1** NSCLC cell line panel characteristics. This data was obtained from the Wellcome Trust Sanger Institute Cancer Genome Project web site: <http://www.sanger.ac.uk/genetics/CGP>

| <b>Cell line</b> | <b>Histology</b>                           | <b>Mutations</b>                                                                 |
|------------------|--------------------------------------------|----------------------------------------------------------------------------------|
| A427             | Adenocarcinoma                             | KRAS, STK11 (LKB1), CDKN2a, SMARCA4 (BRG1), CTNNB1 ( $\beta$ -catenin), p53 (wt) |
| A549             | Adenocarcinoma                             | KRAS, STK11 (LKB1), CDKN2a, SMARCA4 (BRG1), p53 (wt)                             |
| Calu-1           | Squamous                                   | KRAS, p53 (wt)                                                                   |
| H358             | Bronchioalveolar carcinoma                 | KRAS, p53 (wt/null)                                                              |
| H460             | Large cell lung carcinoma                  | KRAS, STK11 (LKB1), PI3K, CDKN2a, p53 (wt)                                       |
| H727             | Lung carcinoid-endocrine tumor             | KRAS, p53 (mt)                                                                   |
| H1355            | Lung adenocarcinoma                        | KRAS, p53 (mt), STK11 (LKB1)                                                     |
| H1650            | Adenocarcinoma, bronchioalveolar carcinoma | EGFR, CDKN2a, p53 (mt)                                                           |
| H1666            | Adenocarcinoma, bronchioalveolar carcinoma | STK11 (LKB1), BRAF, CDKN2a, p53 (wt)                                             |
| H1975            | Adenocarcinoma                             | PI3K, EGFR, CDKN2a, p53 (mt)                                                     |
| HCC827           | Adenocarcinoma                             | EGFR, p53 (mt)                                                                   |

**Online Resource 2** Median-effect analysis of MK-5108 + cisplatin. Cells were exposed concurrently to treatments of MK-5108 + cisplatin at four dose levels. The combination indexes (CI) of effective doses (ED) for 50% and 75% growth inhibition are displayed for the cell line panel

CI>1.1 Antagonistic; CI=0.9-1.1 Additive; **CI<0.9 Synergistic**

| <b>Cell Line</b> | <b>CI at ED<sub>50</sub></b> | <b>CI at ED<sub>75</sub></b> |
|------------------|------------------------------|------------------------------|
| H1975            | <b>0.840</b>                 | <b>0.706</b>                 |
| HCC827           | 0.907                        | <b>0.637</b>                 |
| Calu-1           | 0.909                        | 0.958                        |
| A549             | 0.915                        | 0.943                        |
| H727             | 0.931                        | 1.461                        |
| H1650            | 0.990                        | 2.943                        |
| A427             | 1.0610                       | <b>0.800</b>                 |
| H358             | 1.122                        | 1.0615                       |
| H1355            | 1.367                        | 1.3583                       |
| H460             | 1.409                        | 1.7553                       |
| H1666            | 1.538                        | 1.0466                       |

**Online Resource 3.** Median-effect analysis of MK-5108 + docetaxel. Cells were exposed concurrently to treatments of MK-5108 and docetaxel at four dose levels. The combination indexes (CI) of effective doses (ED) for 50% and 75% growth inhibition are displayed for the cell line panel. Values for H1650 and H727 could not be determined (N/D)

CI>1.1 Antagonistic; CI=0.9-1.1 Additive; **CI<0.9 Synergistic**

| <b>Cell Line</b> | <b>CI at ED<sub>50</sub></b> | <b>CI at ED<sub>75</sub></b> |
|------------------|------------------------------|------------------------------|
| H1975            | <b>0.274</b>                 | 1.378                        |
| H460             | <b>0.348</b>                 | 1.328                        |
| H1355            | <b>0.392</b>                 | 2.574                        |
| Calu-1           | <b>0.580</b>                 | 1.120                        |
| A427             | <b>0.649</b>                 | 1.754                        |
| H1666            | <b>0.704</b>                 | 1.378                        |
| HCC827           | <b>0.822</b>                 | <b>0.877</b>                 |
| A549             | 1.127                        | <b>0.629</b>                 |
| H358             | 1.280                        | 37.349                       |
| H1650            | N/D                          | N/D                          |
| H727             | N/D                          | N/D                          |
